# Supplementary material for: Elucidating interfacial parameters of platinum–palladium bulk alloy single crystals
Source: Royal Society of Chemistry journal article supplement (doi:10.1039/d4ta01771d), 2024-01-01
Supplement: d4ta01771d1.pdf [file d4ta01771d1.pdf]

## Supplementary information

### Elucidating interfacial parameters of platinum–palladium bulk alloy single crystals

Gabriel Melle <sup>a</sup>, Fabian Scholten <sup>b</sup>, Juan M. Feliu <sup>a</sup>, Enrique Herrero <sup>a</sup>, Beatriz Roldan Cuenya <sup>b</sup>, Rosa M. Arán-Ais<sup>a\*</sup>

<sup>a</sup> Instituto de Electroquímica, Universidad de Alicante, Apdo. 99, E- 03080, Alicante, Spain.

<sup>b</sup> Department of Interface Science, Fritz-Haber Institute of the Max Planck Society, 14195 Berlin, Germany.

\*Corresponding author: [rosa.aran@ua.es](mailto:rosa.aran@ua.es)

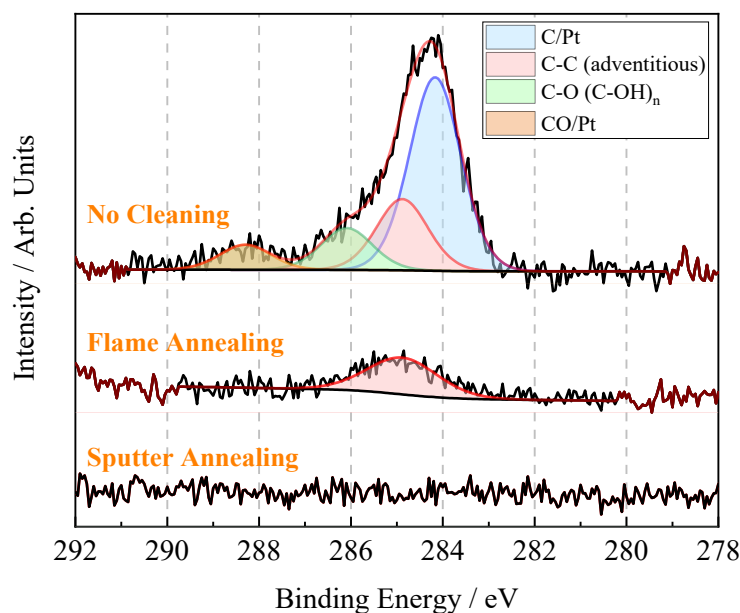

**Figure S1.** XPS C1s spectra of an as-prepared, flame-annealed, and sputter-annealed Pt(100) single crystal.

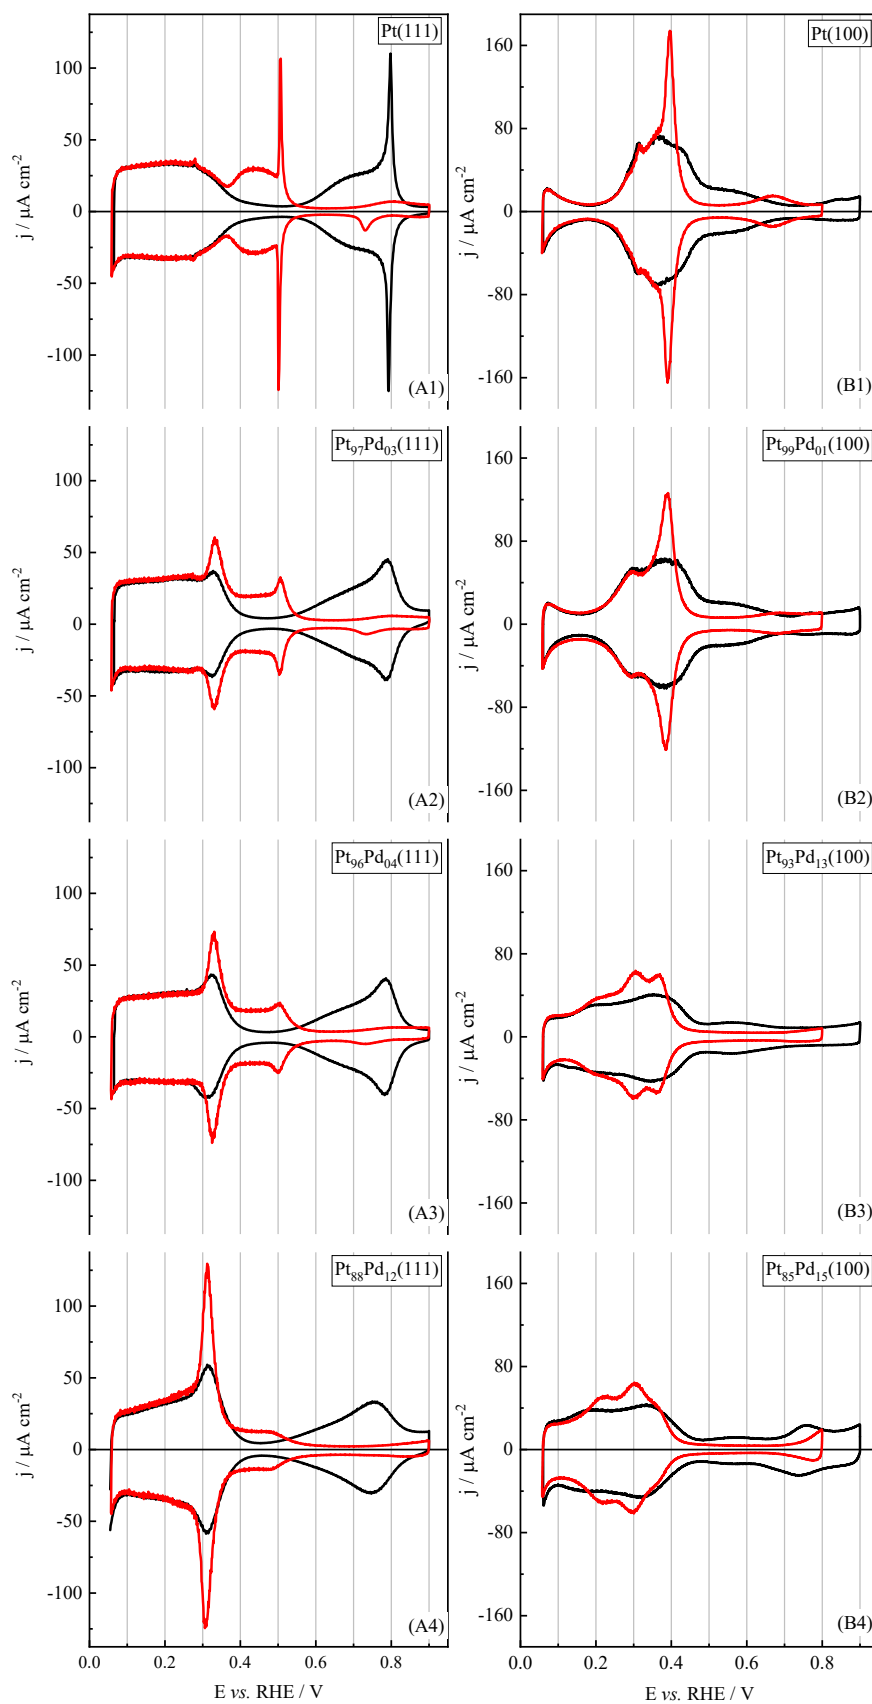

**Figure S2.** Comparison of the voltammetric profiles of the (A1-A4)  $\text{Pt}_{100-x}\text{Pd}_x(111)$  and (B1-B4)  $\text{Pt}_{100-x}\text{Pd}_x(100)$  surfaces, recorded at  $0.05 \text{ V}\cdot\text{s}^{-1}$ , in (black line)  $0.1 \text{ mol}\cdot\text{L}^{-1} \text{ HClO}_4$  and (red line)  $0.1 \text{ mol}\cdot\text{L}^{-1} \text{ H}_2\text{SO}_4$ .

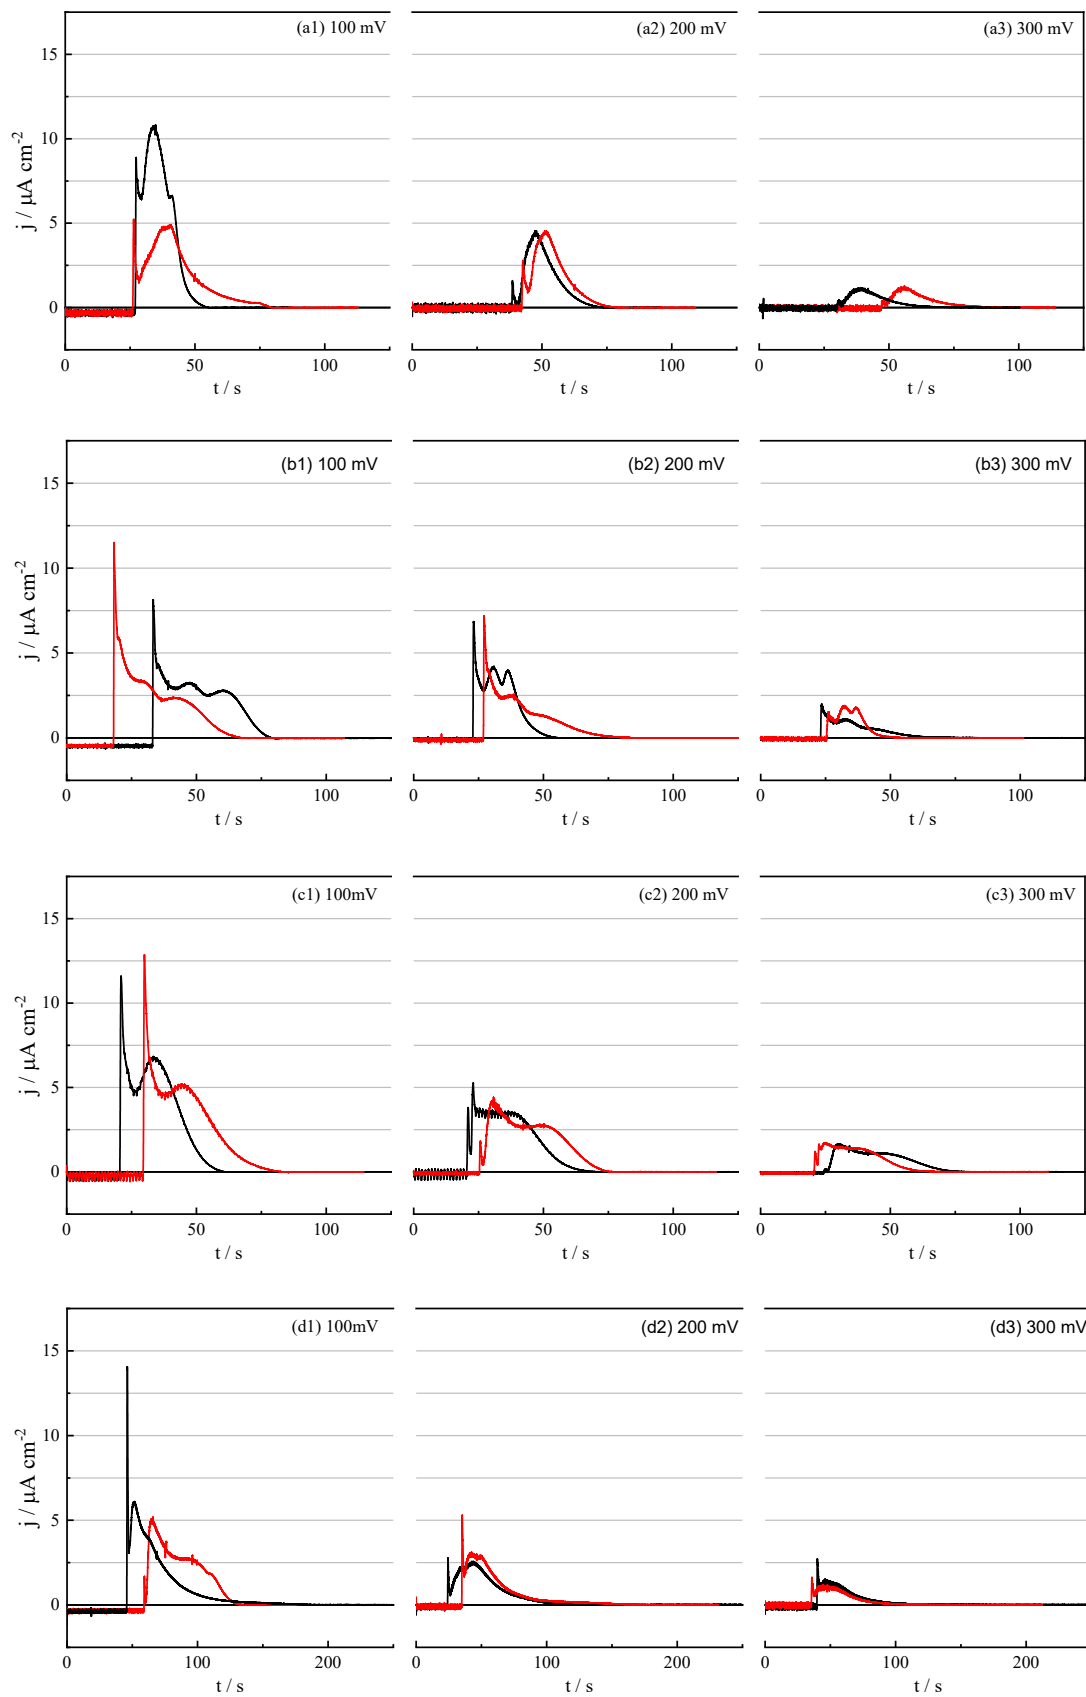

**Figure S3.** Typical transient of current for CO displacement at (a1-d1) 100 mV, (a2-d2) 200 mV, and (a3-d3) 300 mV for (a) Pt(111), (b) Pt<sub>97</sub>Pd<sub>03</sub>(111), (c) Pt<sub>96</sub>Pd<sub>04</sub>(111), and (d) Pt<sub>88</sub>Pd<sub>12</sub>(111) surface in 0.1 mol L<sup>-1</sup> HClO<sub>4</sub>. The black and red curves are the results of experiments repeated on different days.

**Table S1.** Charge density measured during CO displacement experiments at 0.10, 0.20, or 0.30 V on Pt(111) or PtPd(111) family. Numerical value of the charge density with the error is the mean value and the standard deviation, respectively, determined by replicating the experiments 3 or more times.

| <b>E vs. RHE / V</b> | <b>Charge / <math>\mu\text{C cm}^{-2}</math></b> |                                         |                                         |                                         |
|----------------------|--------------------------------------------------|-----------------------------------------|-----------------------------------------|-----------------------------------------|
|                      | Pt(111)                                          | Pt <sub>97</sub> Pd <sub>03</sub> (111) | Pt <sub>96</sub> Pd <sub>04</sub> (111) | Pt <sub>88</sub> Pd <sub>12</sub> (111) |
| 0.100                | 141.5 ± 1.5                                      | 137.6 ± 0.4                             | 155.5 ± 0.5                             | 159 ± 3                                 |
| 0.200                | 62 ± 4                                           | 85.5 ± 0.4                              | 102.2 ± 0.9                             | 92 ± 3                                  |
| 0.300                | 18.0 ± 0.3                                       | 29.0 ± 0.7                              | 40.0 ± 0.6                              | 35 ± 3                                  |

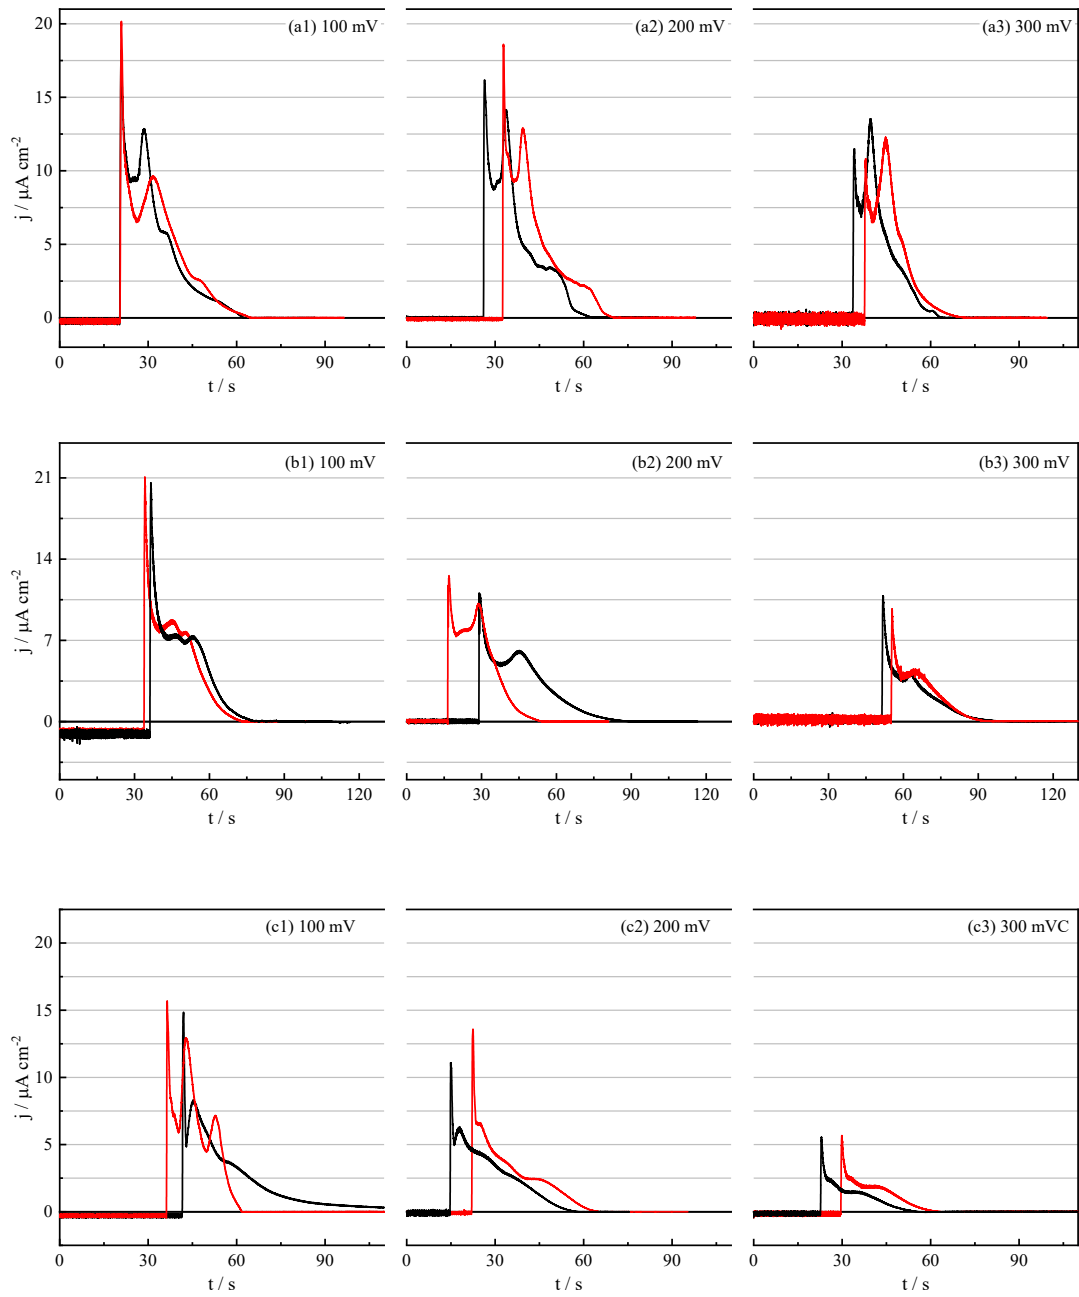

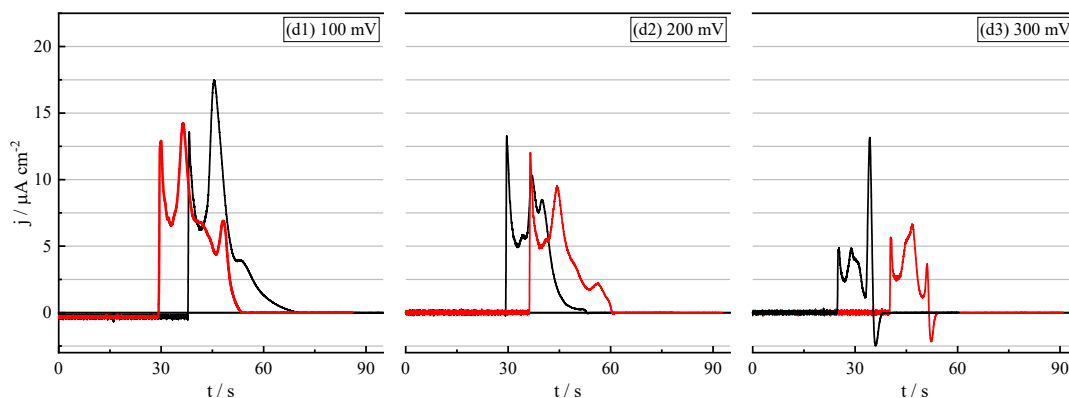

**Figure S4.** Transient of current for CO displacement at (a1-d1) 100, (a2-d2) 200, and (a3-d3) 300 mV for (a) Pt(100), (b) Pt<sub>99</sub>Pd<sub>01</sub>(100), (c) Pt<sub>93</sub>Pd<sub>07</sub>(100), and (d) Pt<sub>85</sub>Pd<sub>15</sub>(100) surface in 0.1 mol L<sup>-1</sup> HClO<sub>4</sub>. The black and red curves are the results of experiments repeated on different days.

**Table S2.** Charge density measured during the displacement of CO experiments at 0.10, 0.20, or 0.30 V on Pt(100) or PtPd(100) family.

| E vs. RHE / V | Charge / $\mu\text{C cm}^{-2}$ |                                         |                                         |                                         |
|---------------|--------------------------------|-----------------------------------------|-----------------------------------------|-----------------------------------------|
|               | Pt(100)                        | Pt <sub>99</sub> Pd <sub>01</sub> (100) | Pt <sub>93</sub> Pd <sub>07</sub> (100) | Pt <sub>85</sub> Pd <sub>15</sub> (100) |
| 0.100         | 202 ± 3                        | 209 ± 3                                 | 171 ± 6                                 | 176 ± 6                                 |
| 0.200         | 186 ± 1                        | 177 ± 2                                 | 123 ± 4                                 | 119 ± 3                                 |
| 0.300         | 135 ± 4                        | 92 ± 6                                  | 47 ± 5                                  | 39.0 ± 0.5                              |

**Table S3.** Supplemental information about CO oxidation on Pt(111) and PtPd(111) family.

| SURFACE                                 | Integrated Charge / $\mu\text{C cm}^{-2}$ | Total charge at 0.90 V / $\mu\text{C cm}^{-2}$ | Corrected Charge / $\mu\text{C cm}^{-2}$ | E <sub>peak</sub> / V |
|-----------------------------------------|-------------------------------------------|------------------------------------------------|------------------------------------------|-----------------------|
| Pt(111)                                 | 487 ± 6                                   | 166                                            | 321 ± 5                                  | 0.755 ± 0.005         |
| Pt <sub>97</sub> Pd <sub>03</sub> (111) | 485 ± 10                                  | 153                                            | 332 ± 10                                 | 0.761 ± 0.009         |
| Pt <sub>96</sub> Pd <sub>04</sub> (111) | 501 ± 5                                   | 159                                            | 342 ± 5                                  | 0.772 ± 0.005         |
| Pt <sub>88</sub> Pd <sub>12</sub> (111) | 486 ± 5                                   | 166                                            | 320 ± 5                                  | 0.764 ± 0.004         |

**Table S4.** Supplemental information about CO oxidation on Pt(100) and PtPd(100) family.

| SURFACE | Integrated Charge | Total charge at 0.85 V / $\mu\text{C cm}^{-2}$ | Corrected Charge | E <sub>peak</sub> / V |
|---------|-------------------|------------------------------------------------|------------------|-----------------------|
|---------|-------------------|------------------------------------------------|------------------|-----------------------|

|                                         | $/\mu\text{C cm}^{-2}$ |     | $/\mu\text{C cm}^{-2}$ |                   |
|-----------------------------------------|------------------------|-----|------------------------|-------------------|
| Pt(100)                                 | $490 \pm 5$            | 160 | $330 \pm 5$            | $0.738 \pm 0.005$ |
| Pt <sub>99</sub> Pd <sub>01</sub> (100) | $512 \pm 8$            | 166 | $346 \pm 8$            | $0.729 \pm 0.007$ |
| Pt <sub>93</sub> Pd <sub>07</sub> (100) | $455 \pm 4$            | 137 | $318 \pm 4$            | $0.722 \pm 0.005$ |
| Pt <sub>85</sub> Pd <sub>15</sub> (100) | $511 \pm 11$           | 155 | $356 \pm 11$           | $0.7904 \pm 0008$ |
